# Supplementary material
Source: PubMed Central journal article supplement (PMC5910255)
Supplement: NIHMS944473-supplement-7.pdf [file NIHMS944473-supplement-7.pdf]

**Table S1. Related to Figures 1-3. Sequences used in this study for biochemical characterization.**

| Name | Sequence (5' to 3')                                              | Figure             |
|------|------------------------------------------------------------------|--------------------|
| cr1  | CACCCGUGCAAAAUGCAGGGGUCUAAAACGACCUGAAUAUUUCAGA<br>UCAAA          | 2A-C; 3A;<br>S4A-G |
| cr2  | CACCCGUGCAAAAUUGCAGGGGUCUAAAACUUUGAUCUGAAAUAUUC<br>AGGUC         | 2A                 |
| cr3  | CACCCGUGCAAAAUGCAGGGGUCUAAAACUGAGCGGAUAACCUCUCU<br>AUGG          | 3A; S4E            |
| cr4  | CACCCGUGCAAAAUGCAGGGGUCUAAAACGAGACCUGAAUAUUUCA<br>GAUCA          | 3A; S4E            |
| cr5  | CACCCGUGCAAAAUGCAGGGGUCUAAAACAUUGUGAGCGGAUAACC<br>UCUCU          | 3A; S4E            |
| cr6  | CACCCGUGCAAAAUGCAGGGGUCUAAAACAACCUCUCUAUGGGCAGU<br>CGGU          | 3A; S4E            |
| cr7  | CACCCGUGCAAAAUGCAGGGGUCUAAAACUGAAUAUUUCAGAUCAA<br>AUCGU          | 3A; S4E            |
| cr8  | CACCCGUGCAAAAUGCAGGGGUCUAAAACGAAUAUUUCAGAUCAAA<br>UCGUA          | 3A; S4E            |
| cr9  | CACCCGUGCAAAAUGCAGGGGUCUAAAACAAUAUUUCAGAUCAAAU<br>CGUAG          | 3A; S4E            |
| cr10 | CACCCGUGCAAAAUGCAGGGGUCUAAAACAUUUUCAGAUCAAAUC<br>GUAGG           | 3A; S4E            |
| cr11 | CACCCGUGCAAAAUGCAGGGGUCUAAAACAGUCGGUGAUGUACGAG<br>ACCUG          | 3A; S4E            |
| cr12 | CACCCGUGCAAAAUGCAGGGGUCUAAAACGUCGGUGAUGUACGAGA<br>CCUGA          | 3A; S4E            |
| cr13 | CACCCGUGCAAAAUGCAGGGGUCUAAAACUCGGUGAUGUACGAGACC<br>UGAA          | 3A; S4E            |
| cr14 | CACCCGUGCAAAAUGCAGGGGUCUAAAACCGGUGAUGUACGAGACCU<br>GAAU          | 3A; S4E            |
| cr15 | CACCCGUGCAAAAUGCAGGGGUCUAAAACAUAUUUCAGAUCAAAUC<br>GUAGG          | 3B                 |
| cr16 | CACCCGUGCAAAAUGCAGGGGUCUAAAACGACCUGAAUAUUUCAGA<br>UCAAAAACGUAGGA | S4A,B              |

|         |                                                                                                                                                   |                          |
|---------|---------------------------------------------------------------------------------------------------------------------------------------------------|--------------------------|
| cr17    | CACCCGUGCAAAA AUGCAGGGGUCUAAAACGACCUGAAU AUUUCAGA<br>UCAAAACGU                                                                                    | S4A,B                    |
| cr18    | CACCCGUGCAAAA AUGCAGGGGUCUAAAACGACCUGAAU AUUUCAGA<br>UCAAAAC                                                                                      | S4A,B                    |
| cr19    | CACCCGUGCAAAA AUGCAGGGGUCUAAAACGACCUGAAU AUUUCAGA<br>UCAAA                                                                                        | S4A,B                    |
| cr20    | CACCCGUGCAAAA AUGCAGGGGUCUAAAACGACCUGAAU AUUUCAGA<br>UCAA                                                                                         | S4A,B                    |
| cr21    | CACCCGUGCAAAA AUGCAGGGGUCUAAAACGACCUGAAU AUUUCAGA<br>UCA                                                                                          | S4A,B                    |
| cr22    | CACCCGUGCAAAA AUGCAGGGGUCUAAAACGACCUGAAU AUUUCAGA<br>UC                                                                                           | S4A,B                    |
| cr23    | CACCCGUGCAAAA AUGCAGGGGUCUAAAACGACCUGAAU AUUUCAGA<br>U                                                                                            | S4A,B                    |
| cr24    | CACCCGUGCAAAA AUGCAGGGGUCUAAAACGACCUGAAU AUUUCAGA                                                                                                 | S4A,B                    |
| cr25    | CACCCGUGCAAAA AUGCAGGGGUCUAAAACGACCUGAAU AUUUCAG                                                                                                  | S4A,B                    |
| cr26    | CACCCGUGCAAAA AUGCAGGGGUCUAAAACGACCUGAAU AUUUCA                                                                                                   | S4A,B                    |
| cr27    | CACCCGUGCAAAA AUGCAGGGGUCUAAAACGACCUGAAU AUUUC                                                                                                    | S4A,B                    |
| cr28    | CACCCGUGCAAAA AUGCAGGGGUCUAAAACGACCUGAAU AUU                                                                                                      | S4A,B                    |
| cr29    | CACCCGUGCAAAA AUGCAGGGGUCUAAAACGACCUGAAU A                                                                                                        | S4A,B                    |
| cr30    | CACCCGUGCAAAA AUGCAGGGGUCUAAAACCUAUCUUCACACUCACGC<br>AUUG                                                                                         | S4H                      |
| Array 1 | GAACUACACCCGUGCAAAA AUGCAGGGGUCUAAAACGACCUGAAU AU<br>UUCAGAUCAAAA UAGCAAUGAACUACACCCGUGCAAAA AUGCAGGGG<br>UCUAAAACA UUCUUAUCUAAA UAGCAUAUGCUUCUGU | 1C, 2A                   |
| Array 2 | GAACUACACCCGUGCAAAA UUGCAGGGGUCUAAAACGACCUGAAU AU<br>UUCAGAUCAAAA UAGCAAUGAACUACACCCGUGCAAAA UUGCAGGGG<br>UCUAAAACA UUCUUAUCUAAA UAGCAUAUGCUUCUGU | 2A,B                     |
| ssRNA1  | UACGUACGCCAUCUCAUCCUGCGUGUCUCCUACGAUUUGAUCUGAAA<br>UAUUCAGGUCUCGUACAUCACCGACUGCCCAUAGAGAGGUUAUCCGCU<br>CACAAUCCACACAACAUACGAGCCGGAAGCAUAAAG       | 2A,B; 3A;<br>S4A,B,E,F,G |
| ssRNA2  | GCCAAGAGAUUCGACCUGUACUCCUUAUUAACAACAUCGACCCUGAG<br>UAUGAGUUAUCCAGUGUAUCCUUCAGUGGAGGAGAGGCUGAAGAGC<br>AUCAACAAGACUUUAUUGAGGACAACAGAGUAUGCAU        | 2C                       |
| ssRNA3  | GCCGCCAAAAGGCGGCCCUACGAUUUGAUCUGAAAUAU                                                                                                            | 3B                       |

|         |                                                                                                                                              |     |
|---------|----------------------------------------------------------------------------------------------------------------------------------------------|-----|
| ssRNA4  | GCCGCCUUUUUGGCGGCCCUACGAUUUGAUCUGAAAUAU                                                                                                      | 3B  |
| ssRNA5  | GCCGCCCCCGGCGGCCCUACGAUUUGAUCUGAAAUAU                                                                                                        | 3B  |
| ssRNA6  | GCCGCCGGGGGGGCGGCCCUACGAUUUGAUCUGAAAUAU                                                                                                      | 3B  |
| ssRNA7  | AAAAAGAAAAAGAAAAACCUACGAUUUGAUCUGAAAUAU                                                                                                      | 3B  |
| ssRNA8  | UUUUUCUUUUUCUUUUUCCUACGAUUUGAUCUGAAAUAU                                                                                                      | 3B  |
| ssRNA9  | CCCCUCCCCCUCCCCCCUACGAUUUGAUCUGAAAUAU                                                                                                        | 3B  |
| ssRNA10 | GGGGGAGGGGGAGGGGGCCUACGAUUUGAUCUGAAAUAU                                                                                                      | 3B  |
| ssDNA1  | TACGTACGCCATCTCATCCCTGCGTGTCTCTACGATTTGATCTGAAATA<br>TTCAGGTCTCGTACATCACCGACTGCCCATAGAGAGGTTATCCGCTCACA<br>ATTCCACACAACATACGAGCCGGAAGCATAAAG | S4C |
| dsDNA1  | TACGTACGCCATCTCATCCCTGCGTGTCTCTACGATTTGATCTGAAATA<br>TTCAGGTCTCGTACATCACCGACTGCCCATAGAGAGGTTATCCGCTCACA<br>ATTCCACACAACATACGAGCCGGAAGCATAAAG | S4D |
| ssRNA13 | UACGUACGCCAUCUCAUCCUGCGUGUCUCCUACGUUUUGAUCUGAAA<br>UAUUCAGGUCUCGUACAUCACCGACUGCCCAUAGAGAGGUUAUCCGCU<br>CACAAUCCACACAACAUACGAGCCGGAAGCAUAAAG  | S4F |
| ssRNA14 | UACGUACGCCAUCUCAUCCUGCGUGUCUCCUACGCUUUGAUCUGAAA<br>UAUUCAGGUCUCGUACAUCACCGACUGCCCAUAGAGAGGUUAUCCGCU<br>CACAAUCCACACAACAUACGAGCCGGAAGCAUAAAG  | S4F |
| ssRNA15 | UACGUACGCCAUCUCAUCCUGCGUGUCUCCUACGGUUUGAUCUGAAA<br>UAUUCAGGUCUCGUACAUCACCGACUGCCCAUAGAGAGGUUAUCCGCU<br>CACAAUCCACACAACAUACGAGCCGGAAGCAUAAAG  | S4F |
| ssRNA16 | CCUGGAUUCGAGAAGAAGAAUGCCAGCGAUCUGCUGUACUUCAGCAA<br>GAUCAAUGCGUGAGUGUGAAGAUAGAUCUCGAUGGCAAGGAGAUCAA<br>CGAUCUCCUGACCACACUGAUCAGCAAGAUCGCGAAUC | S4H |

**Table S3. Related to Figure 5. shRNAs used in this study.**

| Name             | Sequence (5' to 3')                              | Figure        |
|------------------|--------------------------------------------------|---------------|
| B4GALNT1 shRNA 1 | GGCCGCCGGGCCUGUGCGCUCUCGAGAGCGCACAGGGCCCCGGCGGCC | 5D            |
| B4GALNT1 shRNA 2 | UCGCGGGGCUCCUGUACGCGCUCGAGCGGUACAGGAGCCCCAGCGA   | 5D            |
| B4GALNT1 shRNA 3 | AGGCAGCUUCUGGUCAGGAGGCUCGAGCCUCCUGACCAGAAGCUGCCU | 5D, 5E        |
| B4GALNT1 shRNA 4 | AGGAUCAAGGAGCAAGUAGUGCUCGAGCACUACUUGCUCUUGAUCCU  | 5D            |
| ANXA4 shRNA 1    | ACUGAUGAGGGCUGCCUAAUUCUCGAGAAUAGGCAGCCCUCAUCAGU  | 5D            |
| ANXA4 shRNA 2    | GAGAUCAAGGAGCCUACAAGCUCGAGCUUGUAGGCUGUCCUGAUCUC  | 5D            |
| ANXA4 shRNA 3    | UGAGGAGAUCCGGCGCAUAAGCUCGAGCUUAUGCGCCGGAUCUCCUCA | 5D            |
| ANXA4 shRNA 4    | GGAGCCUUGAAGAUGACAUCCUCGAGGAAUGUCAUCUUCAAGGCUC   | 5D, 5G,<br>5A |

|                     |                                                  |                    |
|---------------------|--------------------------------------------------|--------------------|
| HOTTIP shRNA 1      | CAUUUAGGAGCCCCUAUCCUCUCGAGAGGGAUAGGGGCUCCUAAAUG  | 5D                 |
| HOTTIP shRNA 2      | ACUGGAGGCUUGGACUGCAUUCUCGAGAAUGCAGUCCAAGCCUCCAGU | 5D                 |
| HOTTIP shRNA 3      | ACUGUUAGUGAGCAAUUUCAUCUCGAGAUGAAAUUGCUCACUAACAGU | 5D                 |
| Non-targeting shRNA | UAGAUUGCUGUUCUACCAAGUCUCGAGACUUGGUAGAACAGCAAUCUA | 5D, 5E,<br>5G, S5A |

**Table S4. Related to Figures 4-6. qPCR probes used in this study for gene expression analysis.**

| Transcript                         | Probe ID                                                   | Primer 1                       | Primer 2                         | Figure                             |
|------------------------------------|------------------------------------------------------------|--------------------------------|----------------------------------|------------------------------------|
| <i>GAPDH</i>                       | 4326317E                                                   | -                              | -                                | 4D, 5B, 5D,<br>5H, 6F, S6A,<br>S6B |
| <i>EZH2</i>                        | Hs00544830_m1                                              | -                              | -                                | 5H, S6                             |
| <i>EGFR</i>                        | Hs01076090_m1                                              | -                              | -                                | 5H                                 |
| <i>HRAS</i>                        | Hs00978050_g1                                              | -                              | -                                | 5H                                 |
| <i>KRAS</i>                        | Hs00364284_g1                                              | -                              | -                                | 5H                                 |
| <i>NF2</i>                         | Hs00966302_m1                                              | -                              | -                                | 5H                                 |
| <i>NRAS</i>                        | Hs00180035_m1                                              | -                              | -                                | 5H                                 |
| <i>NFKB1</i>                       | Hs00765730_m1                                              | -                              | -                                | 5H                                 |
| <i>PPARG</i>                       | Hs01115513_m1                                              | -                              | -                                | 5H                                 |
| <i>RAF1</i>                        | Hs00234119_m1                                              | -                              | -                                | 5H, S6                             |
| <i>STAT3</i>                       | Hs00374280_m1                                              | -                              | -                                | 5H, S6                             |
| <i>SMARCA4</i>                     | Hs00231324_m1                                              | -                              | -                                | 5H, S6                             |
| <i>TP53</i>                        | Hs01034249_m1                                              | -                              | -                                | S6                                 |
| <i>B4GALNT1</i>                    | Hs01110791_g1                                              | -                              | -                                | 4D, 5B, 5D                         |
| <i>B4GALNT1</i><br>(Custom<br>IDT) | 56-FAM/AGCTGACCA/ZEN/<br>GCTGCTCATAGCC/3IABkFQ/            | CTGAACTTCC<br>ACACCCTGTA<br>G  | GTCAGGATCAA<br>GGAGCAAGTAG       | 5D                                 |
| <i>B4GALNT1</i><br>(Custom<br>IDT) | 56-FAM/TGCGCTCTG/ZEN/<br>GTCCTTCTGCT/3IABkFQ/              | CACGGCGCA<br>AGAGGTAG          | CTTAGAGCGTT<br>AGACAGGATGT<br>G  | 5D                                 |
| <i>ANXA4</i>                       | Hs00984879_m1                                              | -                              | -                                | 5B, 5D                             |
| <i>ANXA4</i><br>(Custom<br>IDT)    | 56-FAM/CCGATGGTG/ZEN/<br>CTCTTGTAGGCTGTC/3IABkFQ/          | CCTTGCCTAC<br>CGCAACA          | TCAATTAGGCA<br>GCCCTCATC         | 5D                                 |
| <i>ANXA4</i><br>(Custom<br>IDT)    | 56-FAM/AGGCCAGGA/ZEN/<br>TCTCAATTAGGCAGC/3IABkFQ/          | GCTTATGCGC<br>CGGATCT          | GATCAGGACAG<br>CCTACAAGAG        | 5D                                 |
| <i>MALAT1</i><br>(Custom<br>IDT)   | 56-FAM/TGGGAGTGG/ZEN/<br>TAGGATGAAACAATTTGGAG/<br>3IABkFQ/ | CCGTACTTCT<br>GTCTTCCAGT<br>TT | GAATTGCGTCA<br>TTTAAAGCCTA<br>GT | 5B                                 |
| <i>HOTTIP</i>                      | Hs00955374_s1                                              | -                              | -                                | 5B, 5D                             |
| <i>MAPT 3R</i>                     | Hs00902192_m1                                              | -                              | -                                | 6F                                 |
| <i>MAPT 4R</i>                     | Hs00902312_m1                                              | -                              | -                                | 6F                                 |
