# Supplementary material
Source: PubMed Central journal article supplement (PMC5910255)

**A**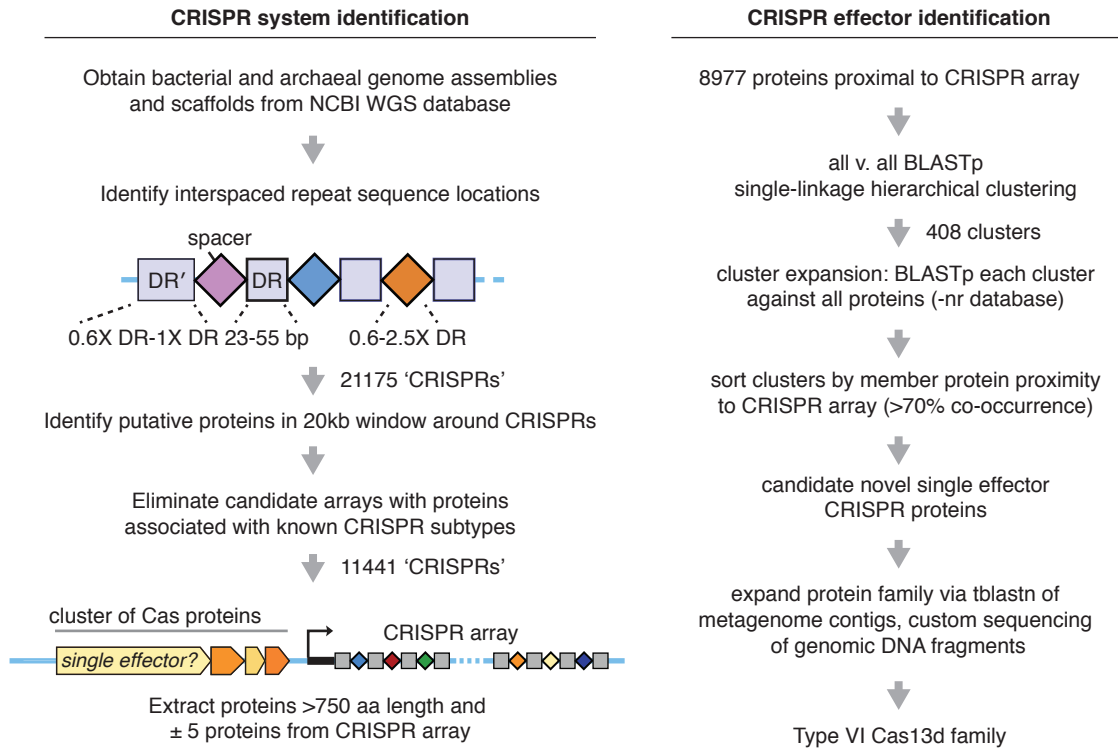**B**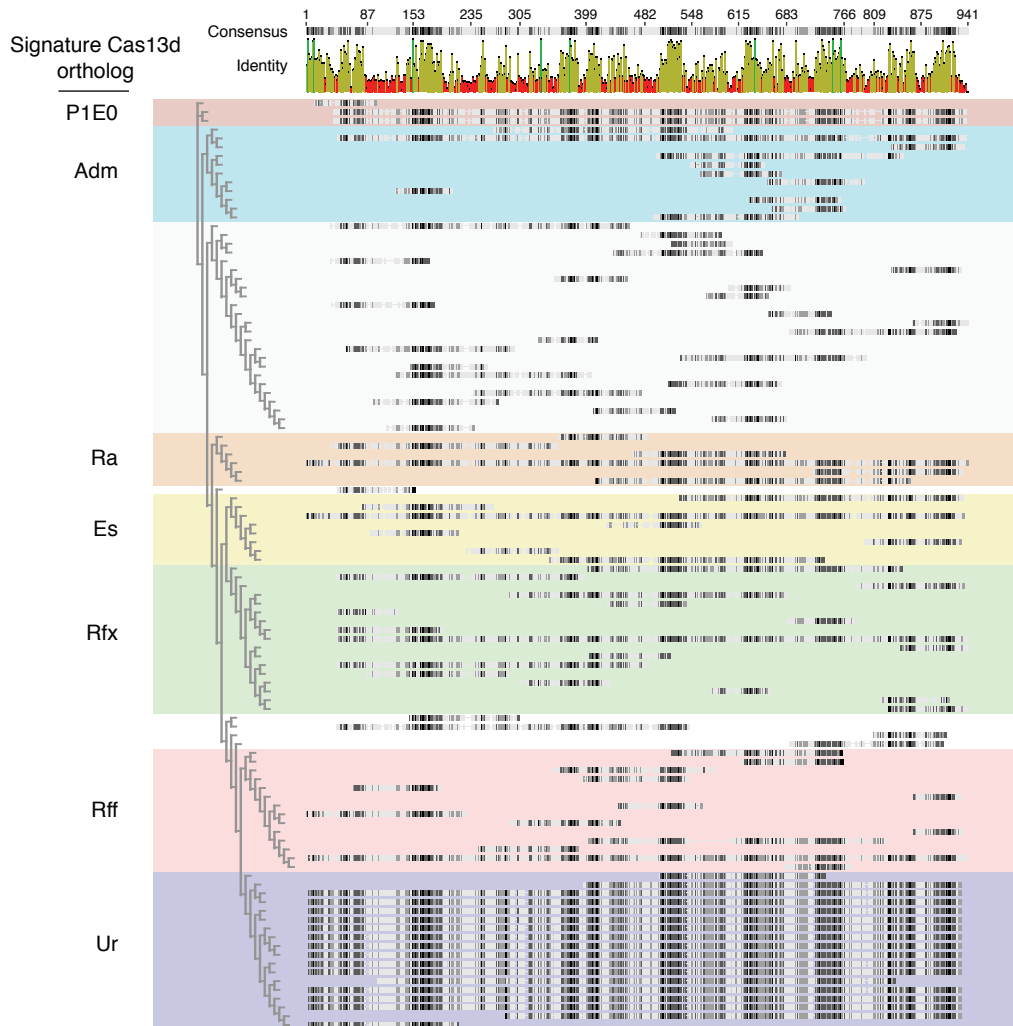

Supplement: NIHMS944473-supplement-1.pdf [file NIHMS944473-supplement-1.pdf]

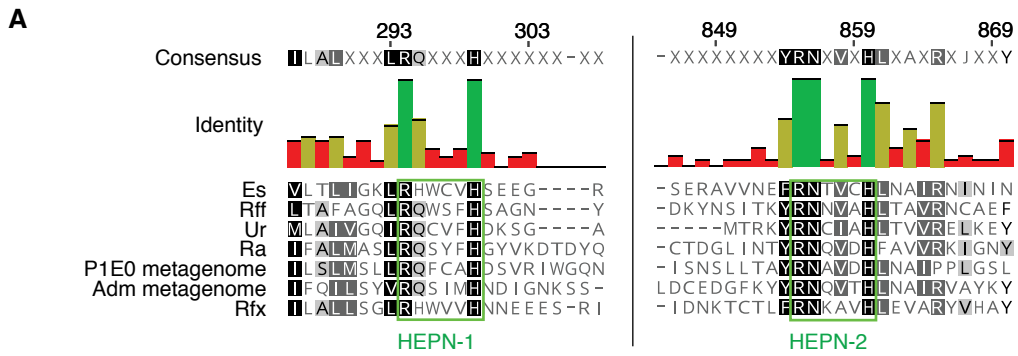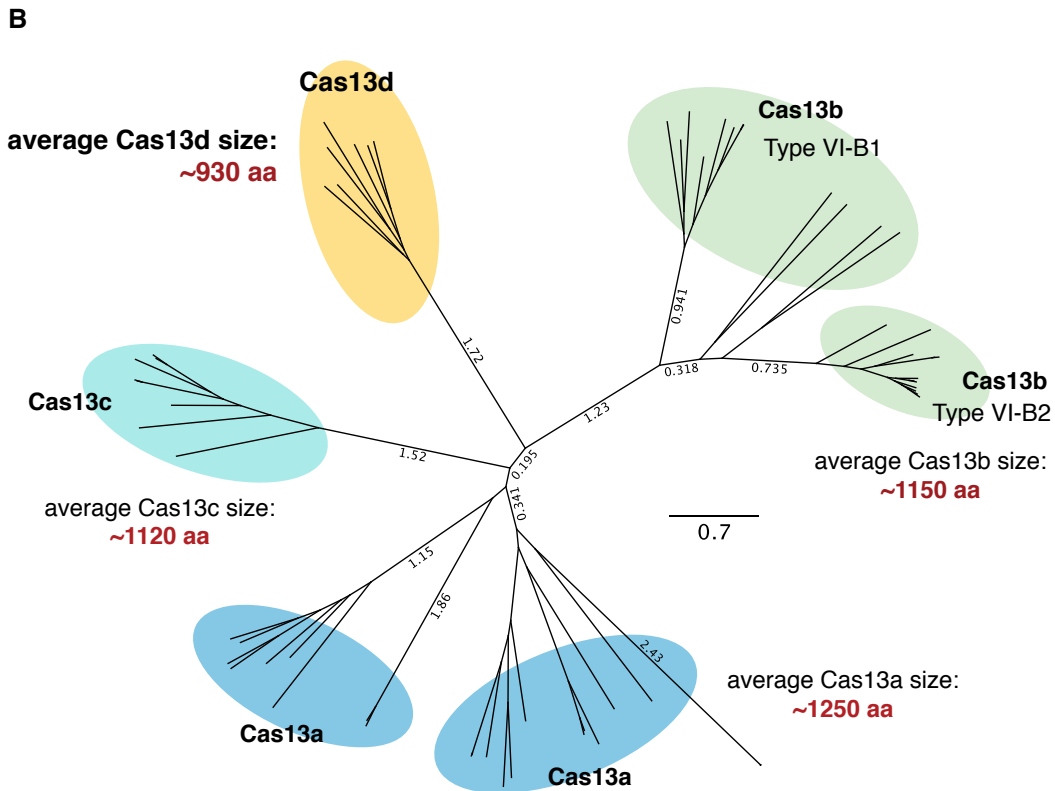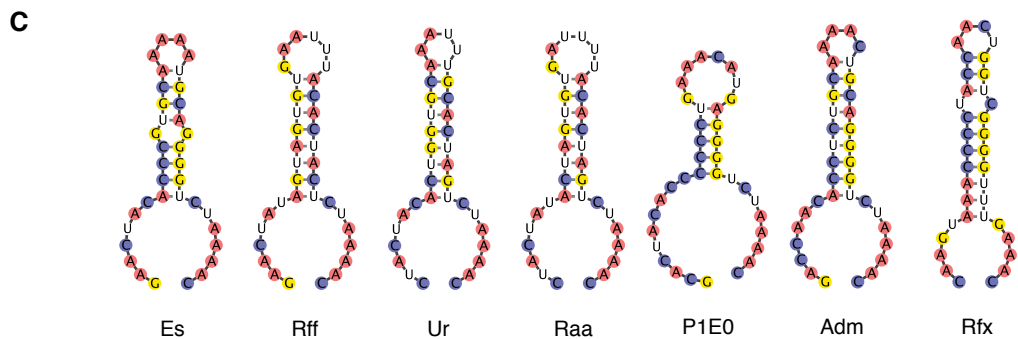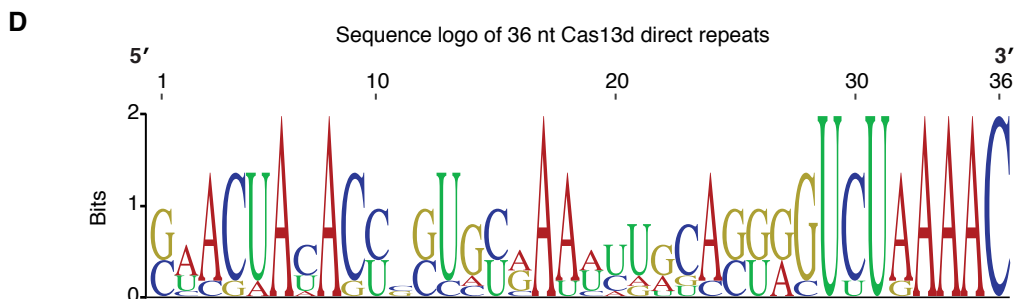

Supplement: NIHMS944473-supplement-2.pdf [file NIHMS944473-supplement-2.pdf]

**A**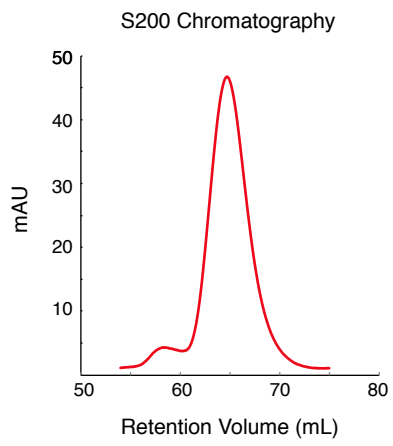**B**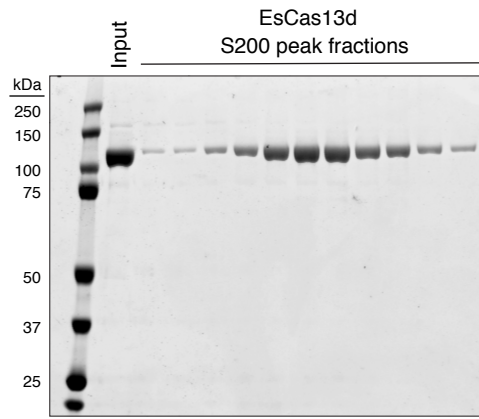**C**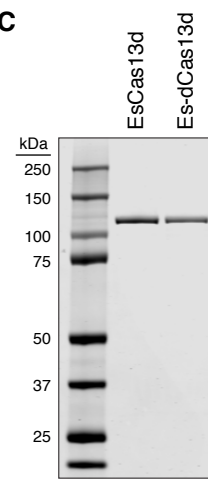

Supplement: NIHMS944473-supplement-3.pdf [file NIHMS944473-supplement-3.pdf]

**A**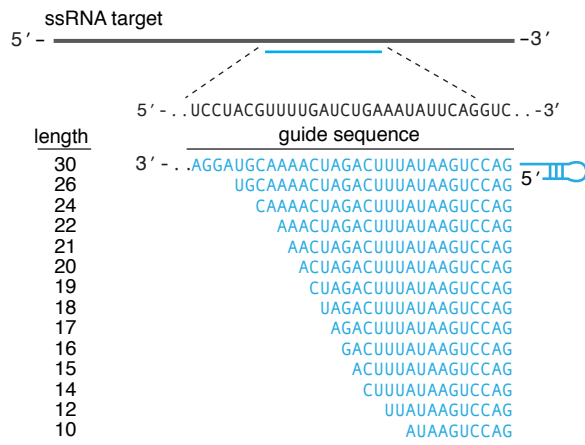**B**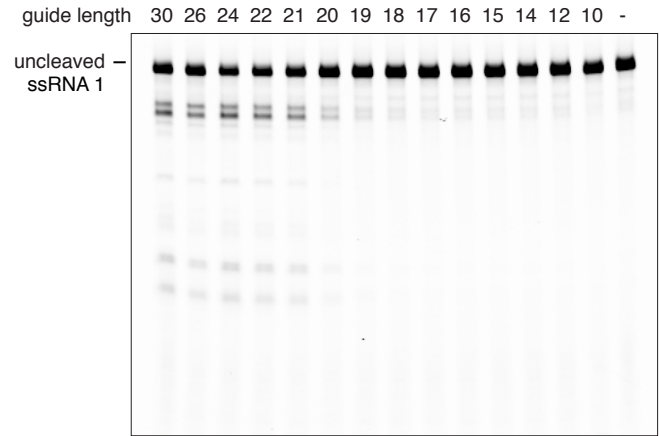**C**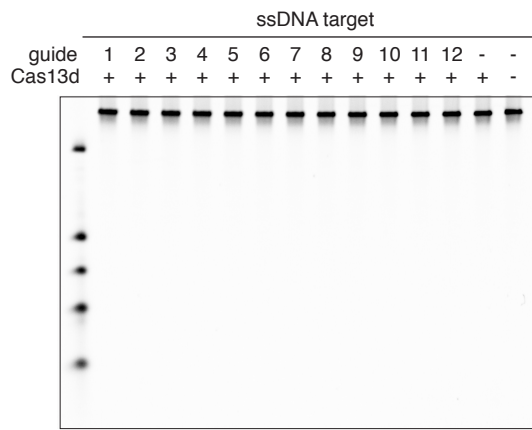**D**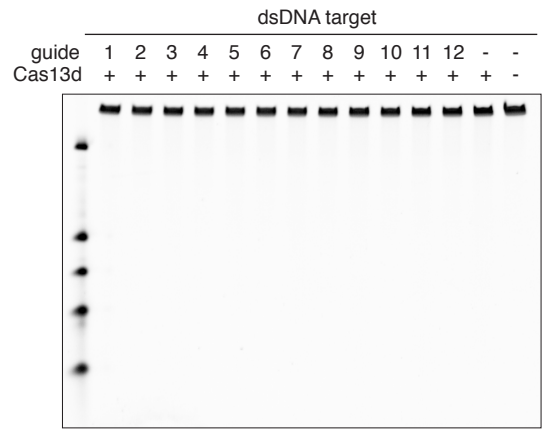**E**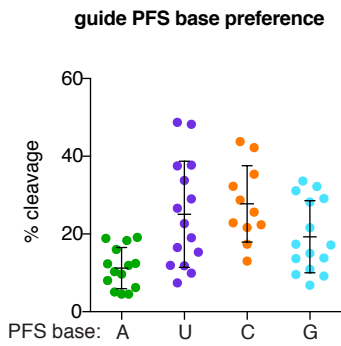**F**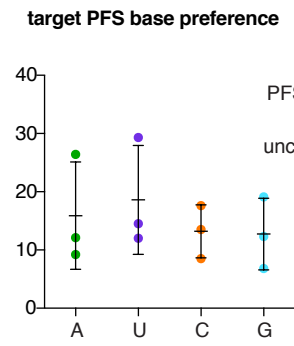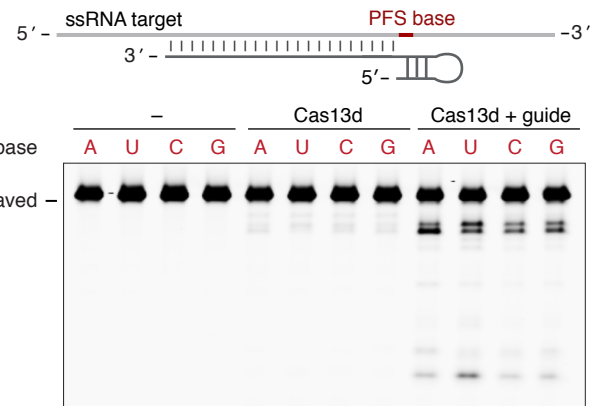**G**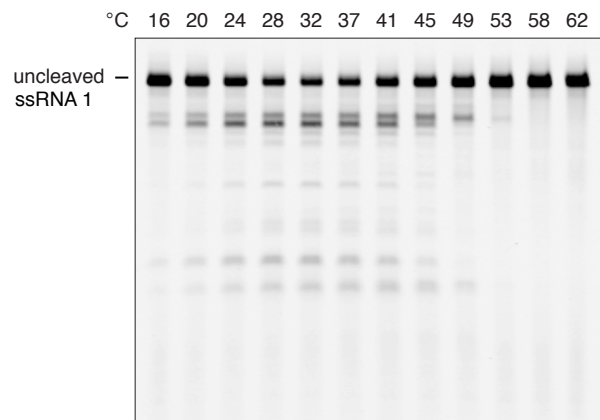**H**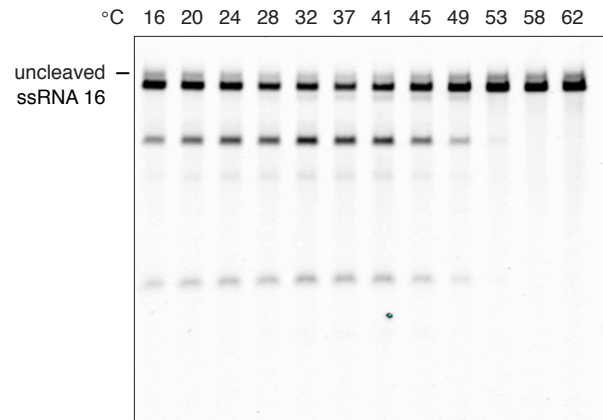

Supplement: NIHMS944473-supplement-4.pdf [file NIHMS944473-supplement-4.pdf]

**A**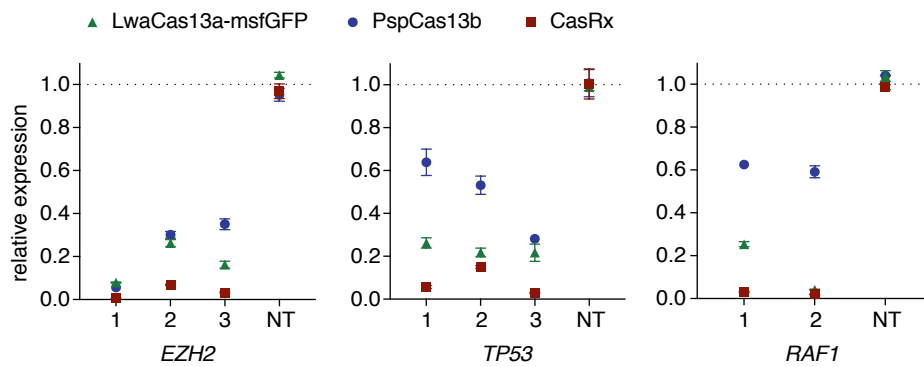**B**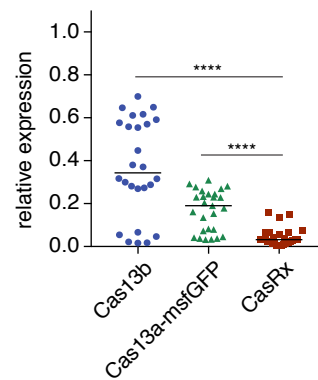**C**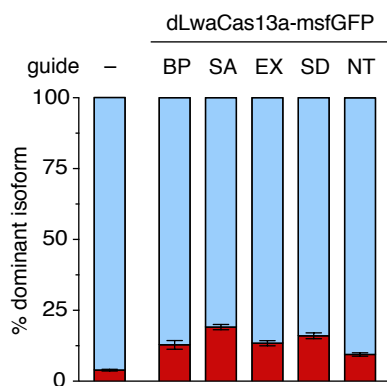**D**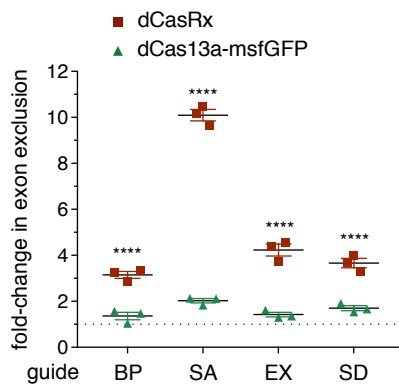

Supplement: NIHMS944473-supplement-5.pdf [file NIHMS944473-supplement-5.pdf]

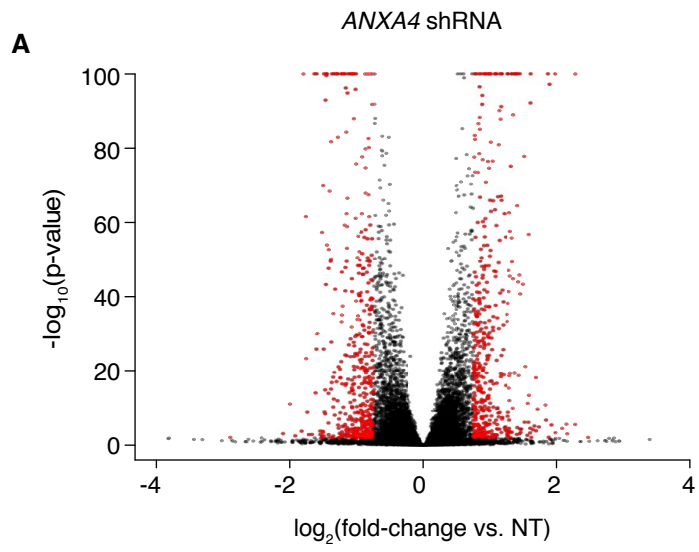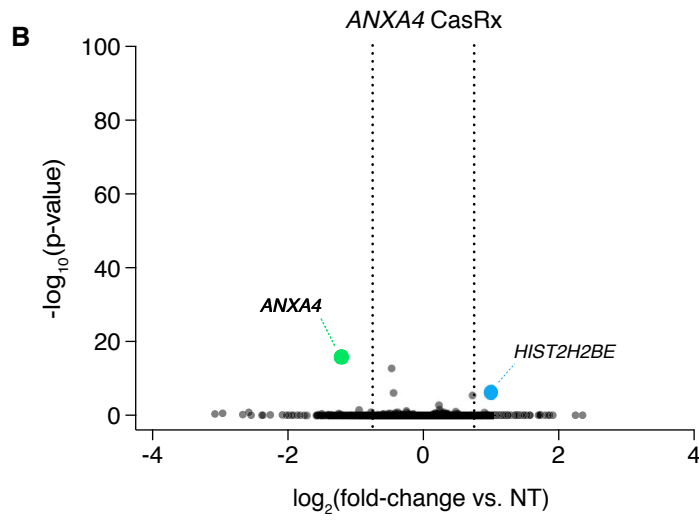

Supplement: NIHMS944473-supplement-6.pdf [file NIHMS944473-supplement-6.pdf]
